# Supplementary material for: Swimming in unsteady water flows: is turning in a changing flow an energetically expensive endeavor for fish?
Source: Oxford University Press journal article supplement (doi:10.1242/jeb.212795), 2020-01-01
Supplement: jeb212795supp.pdf [file jeb212795supp.pdf]

## Supplementary Information

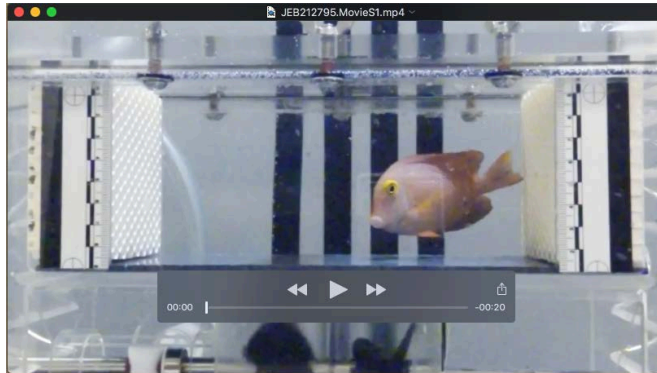

Movie 1: Video of a goldring surgeonfish, *Ctenochaetus strigosus*, swimming in a bidirectional oscillatory flow with an average velocity of  $3.0 \text{ BL s}^{-1}$  (peak velocity of  $4.7 \text{ BL s}^{-1}$ ) and a frequency of 0.3 Hz.

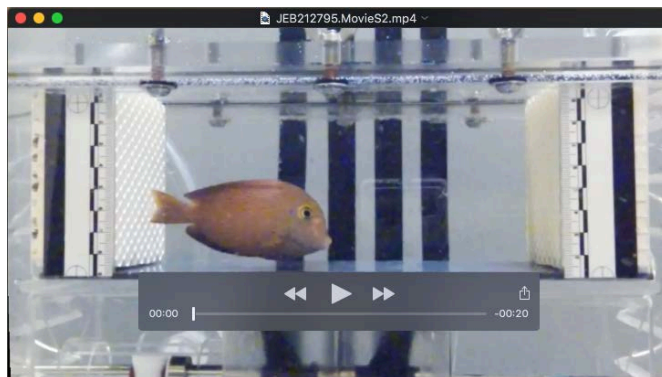

Movie 2: Video of a goldring surgeonfish, *Ctenochaetus strigosus*, swimming in a unidirectional oscillatory flow with an average velocity of  $4.2 \text{ BL s}^{-1}$  (peak velocity of  $5.2 \text{ BL s}^{-1}$ ) and a frequency of 0.3 Hz.
